# Supplementary material
Source: MDPI journal article supplement (https://www.mdpi.com/2072-4292/11/17/2005)
Supplement: s1 [file s1]

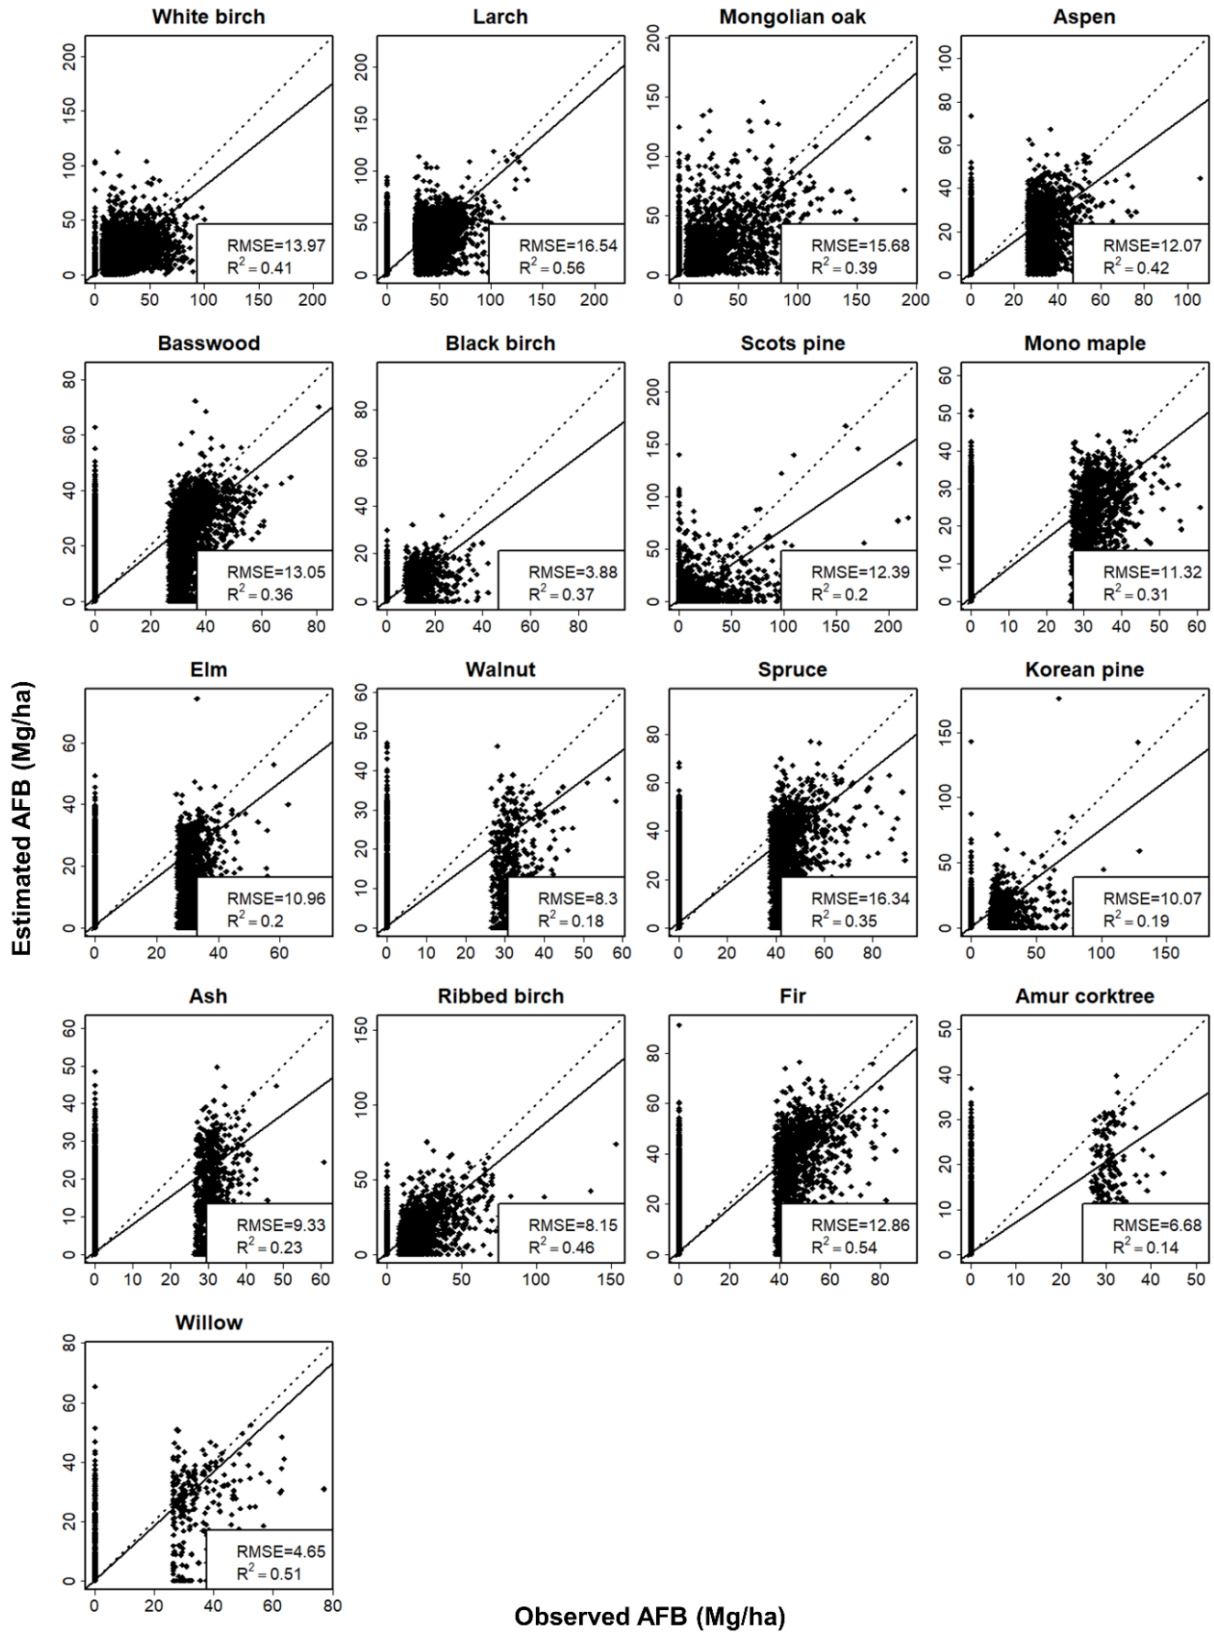

**Figure S1.** Scatter plot between the observed and the estimated AFB for 17 species separately based on the testing data at the stand level. Note that the dotted line is the 1:1 line.

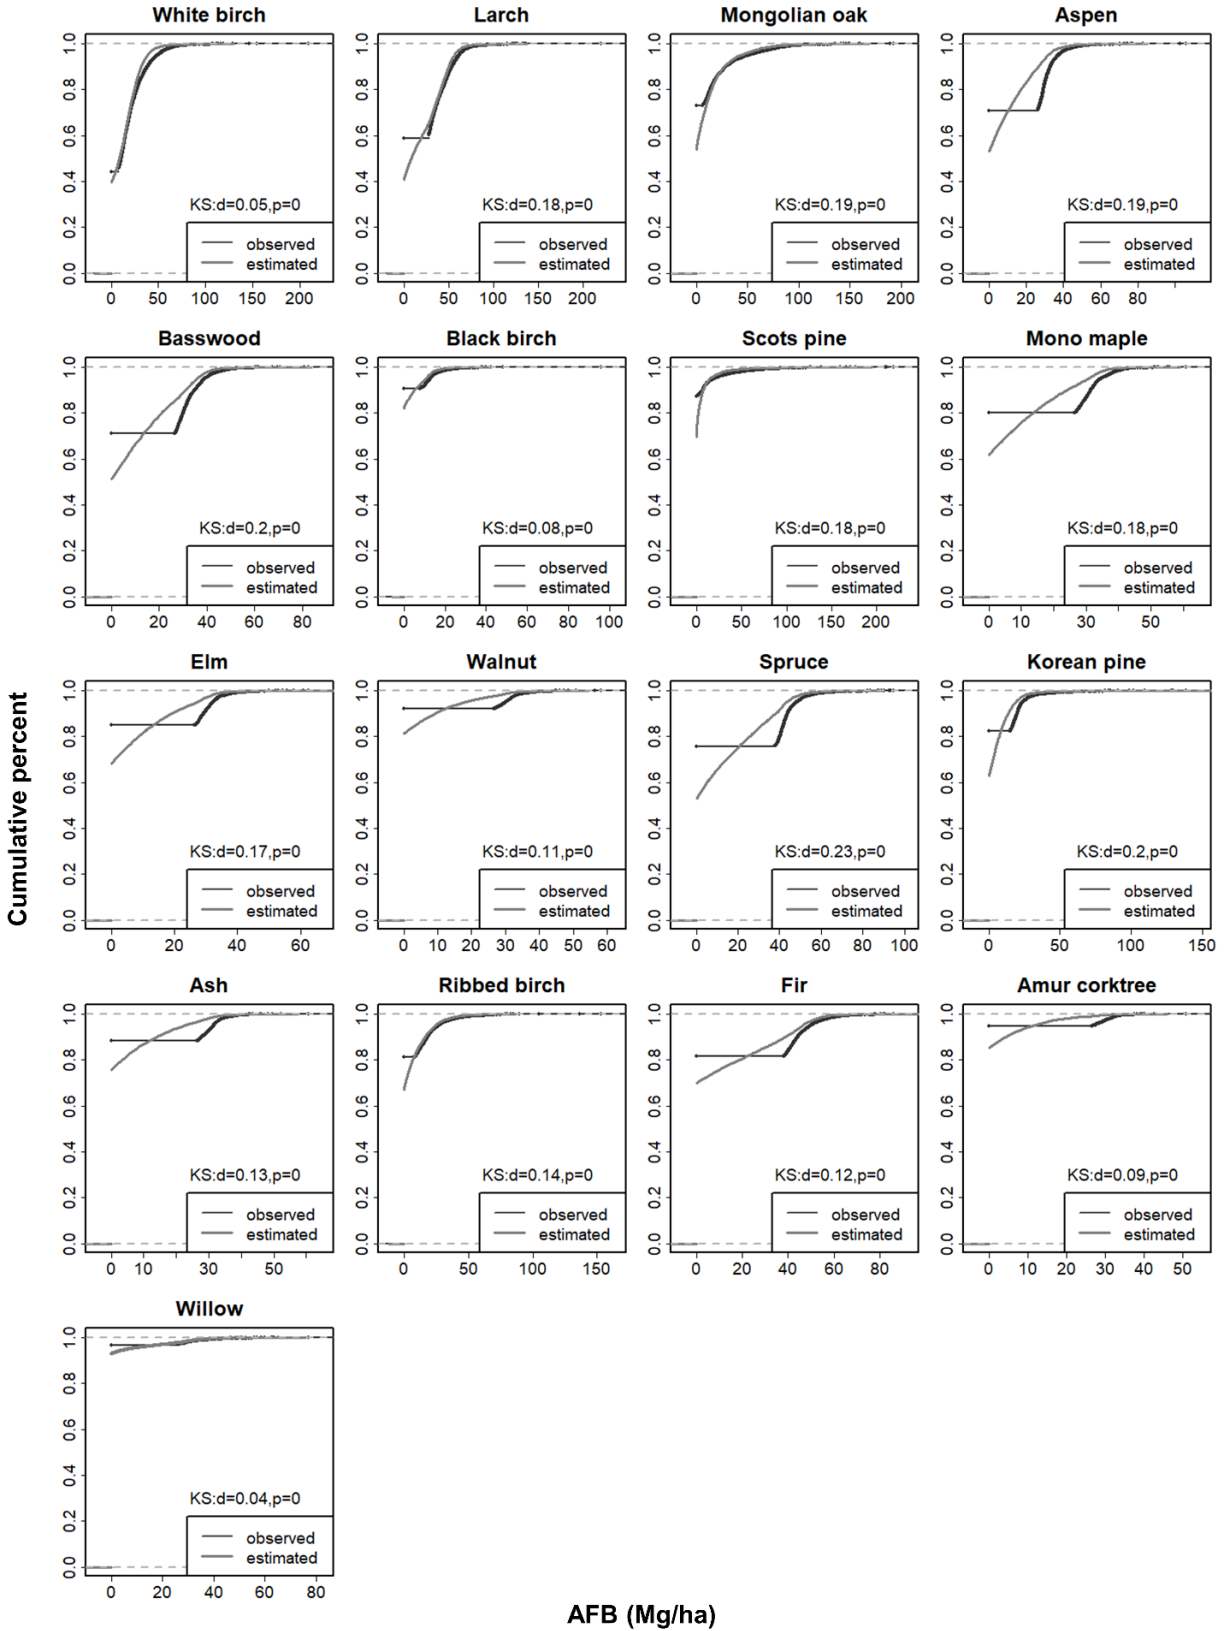

**Figure S2.** Cumulative distribution functions of the observed and the estimated AFB for 17 species separately based on the testing data at the stand level.

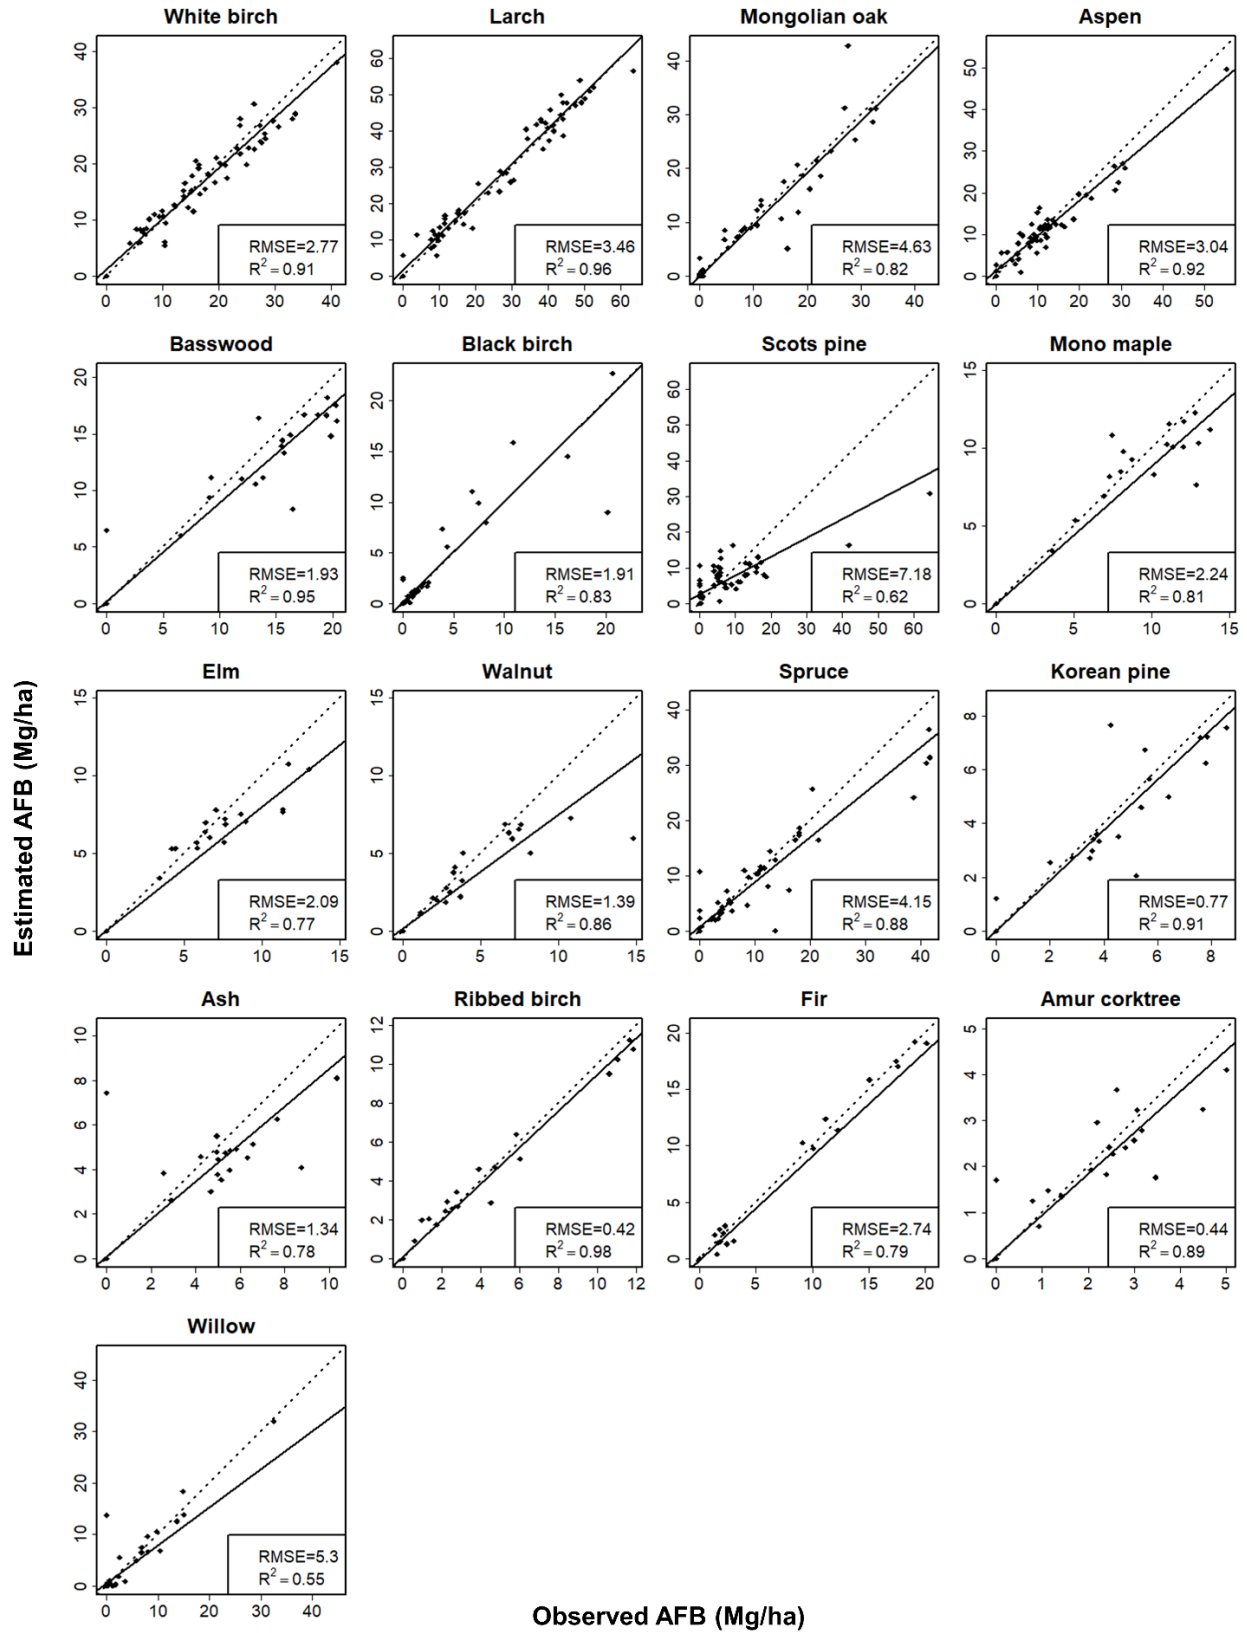

**Figure S3.** Scatter plot between the observed and the estimated AFB for 17 species separately based on the testing data at the ecotype level. Note that the dotted line is the 1:1 line.

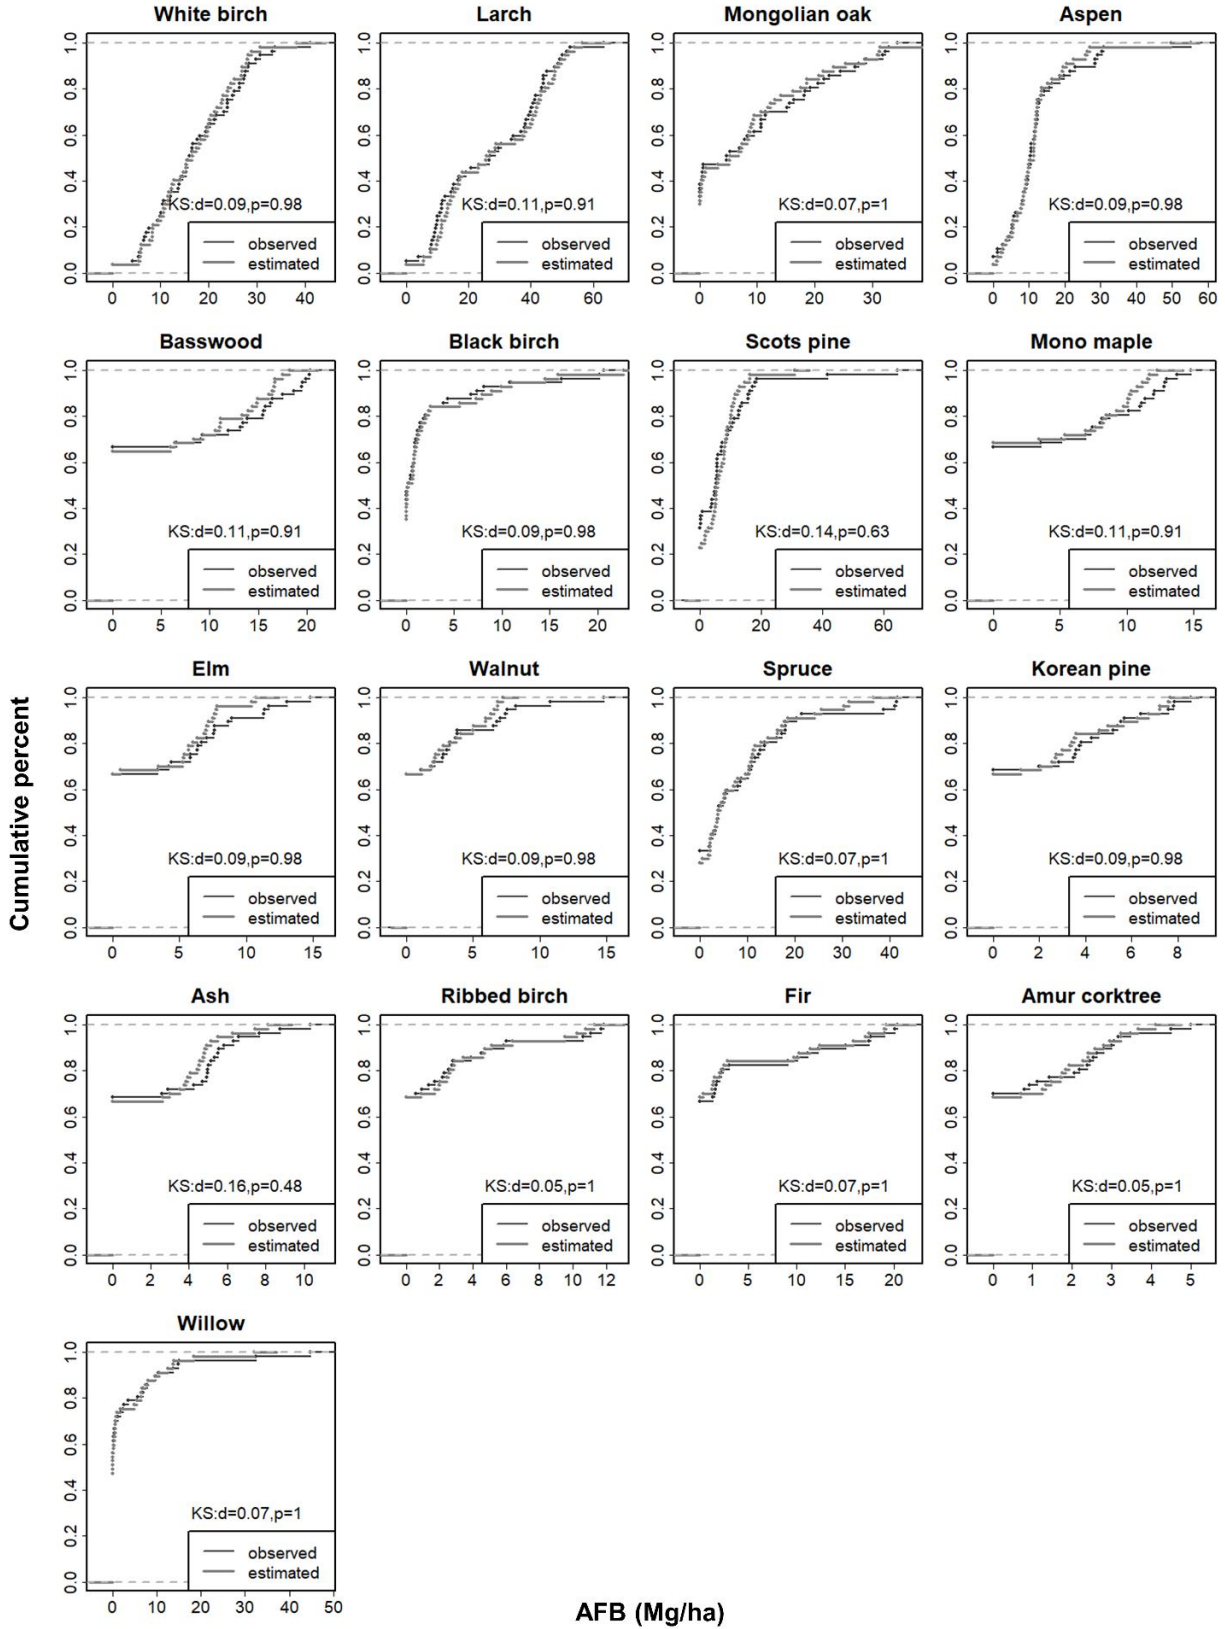

**Figure S4.** Cumulative distribution functions of the observed and the estimated AFB for 17 species separately based on the testing data at the ecotype level.
